# Supplementary material for: Comprehensive analysis of the transcriptional profile of the Mediator complex across human cancer types
Source: PubMed Central journal article supplement (PMC5029609; doi:10.18632/oncotarget.8469), 2016-03-30
Supplement: oncotarget-07-23043-s001.pdf [file oncotarget-07-23043-s001.pdf]

# Comprehensive analysis of the transcriptional profile of the mediator complex across human cancer types

## Supplementary Material

**Supplementary Table S1.** Overview on the amount of over- [n(OE)] and underexpressed [n(UE)], as well as total [n(total)] number of samples analyzed. The table also lists the calculated frequency (%) for the Mediator complex subunits in the analyzed tumor entities which were obtained from the Oncomine database.

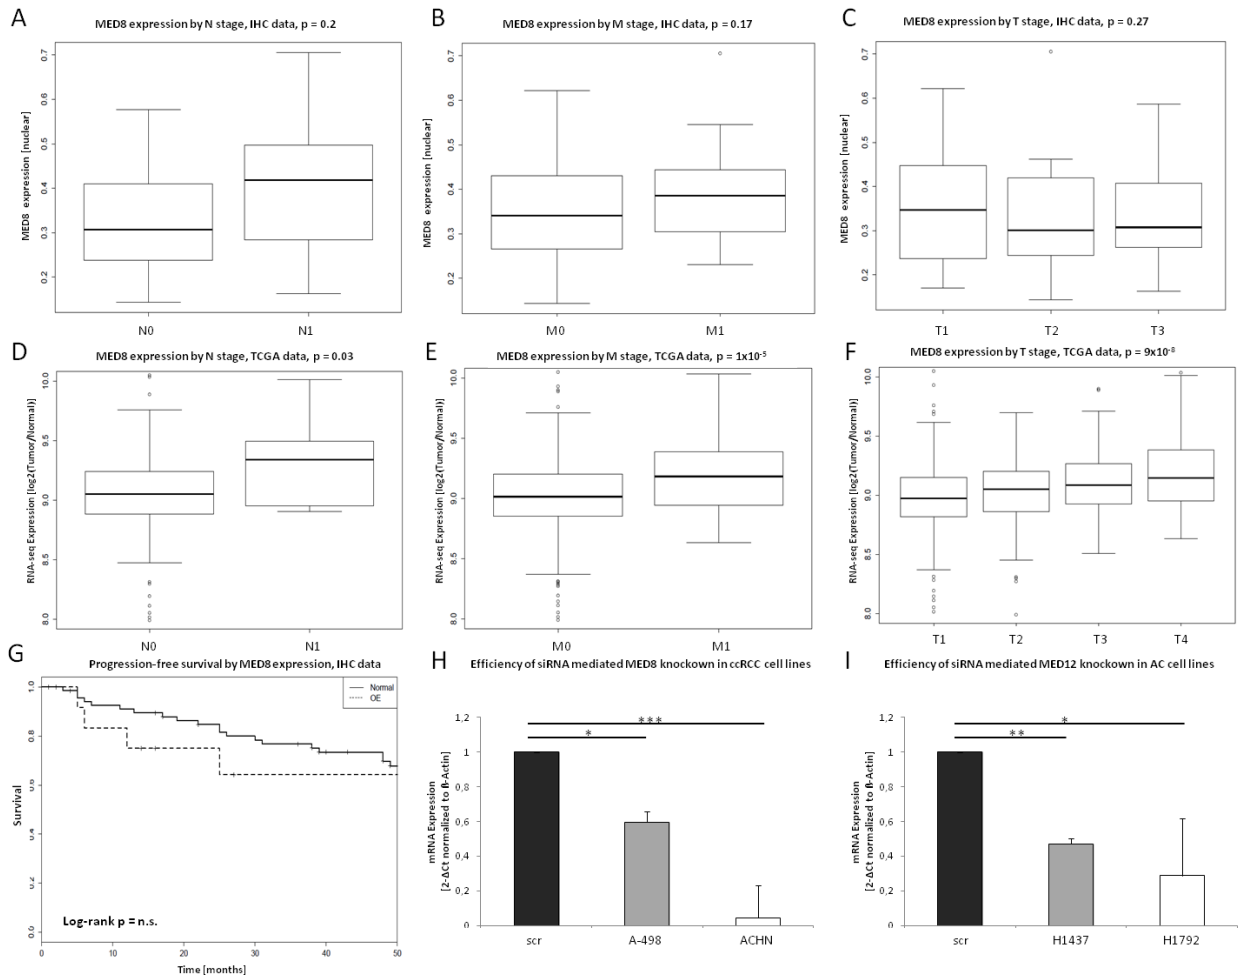

**Supplementary Figure S1. Association of MED8 with parameters of worse disease outcome in ccRCC.** **A-C.** MED8 protein expression did not significantly associate with N, M and T stage in the IHC kidney cohort. **D-F.** Based on the TCGA dataset, MED8 expression is found to be significantly associated with higher metastatic status (N+M stage) and T stage in ccRCC. **G.** Progression-free survival by MED8 overexpression in the kidney cohort. **H+I.** Efficiency of siRNA mediated MED8 knockdown in ccRCC cell lines (**H**) and MED12 knockdown in AC cell lines (**I**).

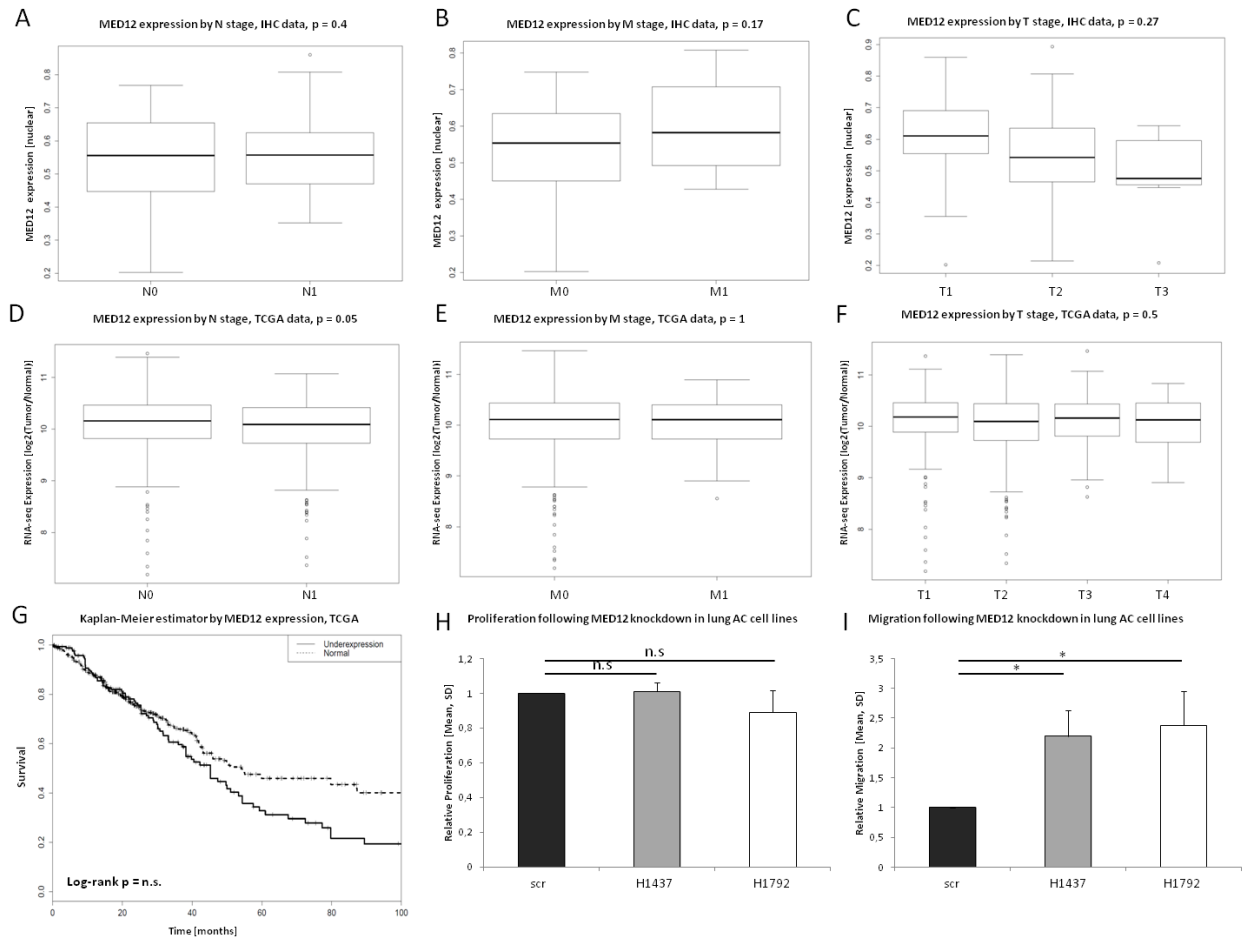

**Supplementary Figure S2. Association of MED12 with parameters of worse outcome in AC.** **A-C.** N, M and T stage were not associated with MED12 expression in the IHC lung cohort. **D-F.** MED12 underexpression is associated with positive lymphnode status in lung AC based on the TCGA dataset. No significant association was found in M- and T-stage. **G.** Survival analysis showed a tendency towards worse outcome for AC patients underexpressing MED12. Especially after 3-4 years, the Kaplan-Meier estimator was able to split the two groups using the TCGA dataset. **H+I.** Proliferation (**H**) of the lung AC cell lines H1437 and H1792 was not affected by siRNA mediated MED12 knockdown, whereas (**I**) Migration was strongly enhanced in MED12-deficient cells as compared to cells transfected with scrambled control siRNA.
